# Supplementary material for: A Bioinformatics Analysis Reveals a Group of MocR Bacterial Transcriptional Regulators Linked to a Family of Genes Coding for Membrane Proteins
Source: Biochem Res Int. 2016 Jun 30;2016:4360285. doi: 10.1155/2016/4360285 (PMC4944035; doi:10.1155/2016/4360285)
Supplement: Supplementary file 1 — The Supplementary Information contains data which could not be included in the main text because of their size. In particular: Sequence alignments among YczR and non-YczR wHTH and AAT domains; the alignments contains 254 and 281 sequences with average length of 67 and 358 residues, respectively. The alignments can only be visualized on the computer screen using a PDF reader program. The figures display the conserved positions and the position characteristic of the YczR subset compared to those of the non-YczR set; A stereo picture of the AAT domain of a homology model of a YczR displaying the predicted specificity-determining positions (SDP); A table listing the non-YczR regulators taken from the RegPrecise data bank; A table listing the YczR regulators found through the SynTax analysis; A table listing the putative organisms containing the YczR regulons used to derive the DNA binding motif. More details are described in the captions to the figures included in the Supplementary Information file. [file 4360285.f1.pdf]

## **Supplementary Information to:**

### **A bioinformatics analysis reveals a group of MocR bacterial transcriptional regulators linked to a family of genes coding for membrane proteins**

Teresa Milano<sup>1</sup>, Sebastiana Angelaccio<sup>1</sup>, Angela Tramonti<sup>2,1</sup>, Martino Luigi Di Salvo<sup>1</sup>, Roberto  
Contestabile<sup>1</sup> and Stefano Pascarella<sup>1,§</sup>

<sup>1</sup>Dipartimento di Scienze biochimiche, Sapienza Università di Roma, 00185 Roma, Italy

<sup>2</sup>Istituto di Biologia e Patologia Molecolari, Consiglio Nazionale delle Ricerche, Roma, Italy

§ Corresponding author  
Stefano Pascarella  
Dipartimento di Scienze biochimiche  
Università La Sapienza  
00185 Roma  
tel. +39 06 49917694  
fax +39 06 49917566  
e-mail: Stefano.Pascarella@uniroma1.it

### **Supplementary Information Figure S1**

Multiple sequence alignment obtained with ClustalO of the wHTH domains of the MocR\_ALL dataset filtered at 90% sequence identity. Sequences are labeled with their GenInfo and RefSeq codes. Codes on grey background indicate YczR set. Coloring code follows the ClustalX scheme.

### **Supplementary Information Figure S2**

Multiple sequence alignment obtained with ClustalO of the AAT domains of the MocR\_ALL dataset filtered at 90% sequence identity. Display is as in Supporting Information Figure 1.

### **Supplementary Information Figure S3**

Stereo picture of the residues indicated by the software JDet as potential SDPs in the homology model of the AAT domain of the MocR from *Saccharopolyspora erithraea*. Magenta stick models correspond to residues already reported in main text Fig. 7; SDPs predicted by either Xdet or S3det in both alignments and which may play important structural and functional roles are indicated with grey stick models (italicized in main text Table 4). Numbering refers to manuscript Figure 6. Panel B displays the model structure rotated by about 180° along the Y axis with respect to representation in panel A.

10 20 30 40 50 60  
gil500075233|ref|WP\_003977408.1| P A Y R A L A D G I R L L V L E G R V P V A A R L P A E R L A L A L T V S R T T V A A Y A E A L R A E G F L E S R R G A G S W I T A V P  
gil506282821|ref|WP\_015748596.1| P A Y R S L A D G I R A A V L D G R L V A G T L P S E R L E S T A L G L S R T T V N A A Y A Q L R D E G F L S R R G S G S V T R L P  
gil500097125|ref|WP\_012037448.1| P A Y Q A L A D G I R H L V L D G R V P V G A R L P A E R L A V A L G L S R T T V A A Y A A L R G T G L S R R G S G S V T R L P  
gil500080795|ref|WP\_011756808.1| P A Y A G L A D A L L V L L D G R I A L D L P S E R L E T A L G L S R T T V T R A Y L A R E A G Y A E A R R G S G T F V R L P  
gil506364683|ref|WP\_015884402.1| P A Y A A L A D A V R L V L V D G R V S P G T L P G E R D L A A S L G T S R T T T A R A Y A E L V A S G W A T A R R G S G T T V T L P  
gil497461309|ref|WP\_009775507.1| P A Y Q V V A D S L R L L I A D G R I A V G T R L P S E R D L T A L A L S R T T V S S A Y A A L R D R G L T L S R R G S G S V A L P  
gil497631986|ref|WP\_009946170.1| P S S Q S L F Q V Y Q K V L D G R L P G T R L P A E R D L A E L L G V S R T L V A R T L E R L R E S G F A E S R R G A G S W I T L P  
gil506285688|ref|WP\_015805463.1| H G S A D L A A A V R M L V L D G R L P A C T R L P A E R M A E A L P V S R T M V S A A L D Q L R A E G L V A S R R G A G T W I L P  
gil500046652|ref|WP\_011272730.1| P A Y L G L A D A I R L L I V D G R L P V G A R L P S E R A L A D L V S R T T V T A A F S K L R E D G Y L H A R R G A R S T T A L P  
gil500025026|ref|WP\_011895119.1| P A Y H G L A D A I R L L I V D G R L P V G A R L P S E R A L E A L V S R T T V T A A Y T Q L R E D G Y L N A R R G A R S T T A L P  
gil5000103306|ref|WP\_011779313.1| P A Y H G L A D A I R L L I I D G R L P V G A R L P S E R L L A E L H V S R T T V T A A Y A Q L R D D G Y L N A R R G A R S T T A L P  
gil500097515|ref|WP\_01173522.1| P A Y R E L A D V V R L L V M D G R I P L D V A L P S E R A L A Q L G L S R T T V T A A Y A S L R E Q G F L T A Q C G R G T C I P  
gil506416251|ref|WP\_015935970.1| P A Y R E L A D V L R L L I D G R V P L D A L P S E R A L C T A L G V S R T T V A A Y S A L R E Q G F L S G G S R G R I R I P  
gil500009769|ref|WP\_011690487.1| P A Y R E L A D V R L L I I D G R V P L D M A L P S E R A L E A L L G V S R T T V T A A Y A S L R E Q G F L S G G S R G R I C I P  
gil499291160|ref|WP\_010982418.1| P A H Q R L D V R L L I D G R L P L G A A L P S E R D L A V A L G L S R T T V T G T A F R T L V E H G Y L L A Q T A R T R A T V R L P  
gil518579264|ref|WP\_019749471.1| P A Y R A L A D G I R L L V H D G R V P L G V A L P S E R L A A V L E L S R T T I T S S Y S V L R D E G Y L I S R Q C S R S T V A L P  
gil501515723|ref|WP\_012523660.1| P A Y R Q L A D G L R L L I D G R L P L D V L P G E R L A A A L E V S R T T V T G A F A R L R E Q G F L S R Q C A G A R T R L P  
gil497487470|ref|WP\_009801668.1| P A Y R Q I A N R L F A I L D G R V L G V K L P G E R R L A A L E V A R T I T V S Q A Y D L L R A E G F L S G G R G S V T L P  
gil612152712|gb|AHW95383.1| P L W R Q L A D A L R L L I D G R L A L N T R L P G E R E L A T A L D V S R T T V S S A L A H L R E E G Y L E S R H G S G S R V L L P  
gil444352796|ref|WP\_007388940.1| P L W R Q L A E A L R L L I D G R L A E L T R L P G E R E L A T A L N V S R T T I A S A L G L R E E G Y L S R Q C S G S R I A L P  
gil152968994|ref|WP\_001334103.1| P L W R Q L A A L R L L I D G R L T L Q T R L P G E R L A A A L N V S R T T I A S A L G Q L R E E G F L Y S R Q C S G S R I V L P  
gil156934973|ref|WP\_001438889.1| P V Y R Q L A Q A L R L L I D G R L P L A S R L P G E R L A G A L G V S R T T I A S A L H L R D E G F L S R H G A G S E I A L P  
gil512651807|ref|WP\_008109897.1| P L W R Q L A D A L R L L I D G R L A M E T R L P G E R L A S M L E I S R T T V A S A L A H L R D E G F I T S R Q C S G S R I V L P  
gil387890370|ref|WP\_006320668.1| P V Y R Q L A D G L R L L I D G R L P L G C R L P G E R L A T A L G V S R T T V A A A L G L L R E A G Y L H S R H G A G S V T M L P  
gil311280640|ref|WP\_003942871.1| P L W R Q L A Q A L R L L I D G R L A D S R L P G E R L A A Y L N I S R T T V A S A M A Q L R E E G Y L E S R Q C S G S R V L L P  
gil157146924|ref|WP\_001452423.1| P V W R Q L A E A L R L L I D G R L A L D S R L P G E R L A A Y L N I S R T T V A S A M A Q L R E E G Y L E S R Q C S G S R V L L P  
gil689261650|gb|AIRO2582.1| P R W R Q L A D A L R L L I D G R L A I D S R L P G E R L S T A L G V S R T T V A S A L A H L R D E G F I T S R Q C S G S R I V L P  
gil334345685|ref|WP\_004554237.1| P A Y R Q L A Q A L R M L V L D G R I P L N V R L P G E R L A A A L G L S R T T I A A A F D R L R D E G F L S R Q C S G S V T L P  
gil330469263|ref|WP\_004407006.1| P D Y A A L A G A V R G L L A D G R L P L G V R L P A E R D L A E A L Q I S R T T V T A A Y R L R D S G L S R R A G A S W I T L P  
gil363181783|ref|WP\_004572947.1| P R Y E D L A A R I R M L L V D G R L A A S T R L P S E R S L A D L G L S R T T V A A Y A R L R D A G F V D A R R G S G H V T S H P  
gil627354603|gb|AIJ20481.1| H G A A D L A A A I E L G V L D G L P L V G T R L P S E R L A E A L D V S R T L I G A A L D K L R A D G L V A S R R G A G S W I T L P  
gil506928987|ref|WP\_008009425.1| H G A A D L A A A V E L L V D G R L P L G T K L P A E R L A E A L D V S R T L I G A A L D K L R A D G L V A S R R G A G S W I A A P  
gil345010787|ref|WP\_004813141.1| P A Y R S L A D G V R L L E G R V P V A A R L P A E R L A T A L A V S R T T V A A Y A E A L R A E G F L E S R R G A G S W I A M P  
gil300502830|ref|WP\_003762641.1| Q G A A D L A A A I E L Q V L D G Q L P L G T R L P A E R L A D A L G A S R T L I G A A L D R L E N G F V A S R R G A G S W I A L P  
gil636570858|gb|AIAO7543.1| P A Y R S L A D G V R R L V L E G R V P V A A R L P A E R L A T A F G V S R T T V A A Y A E A L R A E G F L E S R R G S G S W I A V P  
gil433609875|ref|WP\_007042244.1| Q G S A D L A A A I R M L V L D G R L P A C T R L P A E R E M A D A L P V S R T T I T A A L D R L S E G L V A S R R G A G S W I L P  
gil433646944|ref|WP\_007291946.1| P A Y L G L A D G I R M L I V D G R L P V G A R L P S E R A L A D L V S R T T V T A A Y T Q L R E D G Y L N A R R G A R S T T A L P  
gil357392626|ref|WP\_004907467.1| P A Y R T L A A Q V S R L V A D G R L P V G T R L P A E R L A E A L N L S R T T V A A Y A E A L R A D G F L H S R R G A G S W I A L P  
gil723606875|gb|AIY00251.1| P A Y K A L S E R I R V L M D G R L S A C K A L P A E R L S Q A L E L S R T T V A A A Y S K L R D D G F L E S V R G S G S T R L P  
gil690280879|gb|AIR42385.1| P A Y G A L A D A I R L L V I D G R L P L G A R I P S E R A L A S A L H V S R T T V T T A Y A E L R E S G Y L C G R Q A G A R S T T A L P  
gil5656464951|ref|WP\_00333376.1| P D Y A A L A G A I R G L L I D S R L P L G V R L P A E R L A E L S G V S R T T V T A A Y A R L R E T G H L T S R R G A G S W I T L P  
gil578013512|gb|AHIO1771.1| S A S A D L S A A L R L L V L D G R L P A G T R L P A E R L A Q A L G A S R M I T A A L D H L R T E G F V A S R Q C S G S V T L P  
gil392415666|ref|WP\_006452271.1| P A Y H G L A D A L R L L I V D G R V P L E A R L P S E R V L A D L R V S R T T V T A A Y A Q L R D D G Y L V A R R G A R S T T A L P  
gil386359046|ref|WP\_006057292.1| P A Y R G L A D G V R L L V L E G R V P V S A R L P A E R L A A L A V S R T T V A A A Y D A L R A D G F V K S R R G A G S W I A P  
gil330459263|ref|WP\_005461289.1| P D Y A A L A G A V R G L L A D G R L A L G V R L P A E R L A E A L A I S R T T V A A Y A R L R E T G H L T S R R G A G S W I T L P  
gil297560372|ref|WP\_003679346.1| P F Y L A I A R A V S G L V L D G R V P L N T R L P A E R D L A A A L G V S R T T V T A A Y A W L R D N R F L E S R Q A G S W I T L P  
gil126434423|ref|WP\_001070114.1| P V Y Q G L A D G I R M L V D G R L P V G A R L P S E R A L A E C L R V S R T T V T A A Q L R D E G Y L L A R R G A R S T T A L P  
gil296129937|ref|WP\_003637187.1| P A Y Q A L A D G I R L L V R A G T L P L A R L P S E R L A E V A D A L G V S R T T V T A A Y D L R D E G F L A S R R G S G T V T L P  
gil332670710|ref|WP\_00453718.1| P A Y T A L A D A L R A A V L S G T L P L S T R L P G E R L A D A L G I S R T T A T A A Y G L L R D E G Y L L S R R G S G T V T L P  
gil336320524|ref|WP\_004600492.1| P A Y A A L A D G L R A A V L S G R L P L T R L P S E R L A E A V G V S R T T T A A Y D A L R D E G Y L L S R R G S G T V T L P  
gil375143000|ref|WP\_005003649.1| P A Y Q G L A D A I R L L I I D G R V P V G A R L P S E R T L A D V L R V S R T T V T S A F N Q L R E D G Y L N A R R G A R S T T A L P  
gil284033522|ref|WP\_003383453.1| P A Y R A L S A G L R L L I A D G R I M P D S R L P S E R L I D A L G V S R T T V A A Y A R L R D R G L T L S R R G S G S V A L P  
gil317124473|ref|WP\_004098585.1| P A Y R S L A E L R L R L I A D G R I L P G T R L P S E R A L M S Q L G L S R T T V G A A F D V L R A E G F I V T R R G S G S V A L P  
gil269126482|ref|WP\_003299852.1| P R Y V A L A R A V R E L V L S G G L P R M R L P A E R D L A A A L G V S R T T V T A A Y D R L R A E A G Y V E S R Q A G S W I A L P  
gil291300192|ref|WP\_003511470.1| P A Y L G L A D A L R L L I C D G R I P L D T R L P S E R L I G A L G V S R T T V T R A Y A E L R S S G Y A A A R H G S G T V T R L  
gil271967238|ref|WP\_003341434.1| P Y Y S A L A G A V R L L I D G R L S R M R V P A E R H L A E A L G V S R T T V T A A Y D R L R E Q G Y L E S R Q A G S W I A L P  
gil296393770|ref|WP\_003658654.1| P V Y H A L A D A I R S A V L D G R L P L G A Q L P S E R T L A Q A L R V S R T T V T A Y G L R E S G L H V R G Q A R S A I A L P  
gil334337332|ref|WP\_004542484.1| P A Y V A L A D A V R S A V L S G T L A P L T R L P S E R L A A A L G V S R T T T A A Y A R L R E G F A V S R Q C S G T V A L P  
gil496141024|ref|WP\_003648267.1| P A Y L A L A E A L R L L V L D G R V S V G T A L P S E R A L A A H L E V S R T T V T A A Y A E L R D S G H L Q S R Q A R S V L T L  
gil152968087|ref|WP\_001363871.1| P A L R A L A D I R L L L L D G R I T S G T R L P A E R L A A A L G V S R T T V A A A Y A R L R E S G H L T S V R G S G S V A L P  
gil440288730|ref|WP\_007341495.1| P L W R Q L A Q A L R L L I D G R L A E L S R L P G E R E F A T L G V S R T T I A S A L A Q L R E E G Y L S R H G S G S W M L P  
gil500097040|ref|WP\_011773047.1| D S S R I V S R V K E W I A -- G A A P G A K L P S T R Q L V A E Y Q A S P V T V Q K A L R T L A G L I E S R P G V G T F V R A Y  
gil506416634|ref|WP\_015936353.1| D S S R I V L A L K W I A -- G A A P G A K L P S T R S L V A E Y Q A S P V T V Q K A L Q L T A G L I E S R P G V G T F V R A Y  
gil500011581|ref|WP\_01062299.1| D S S R I A A R L E W I A -- T A A P G A K L P S T R S L V A G Y Q A S P V T V Q K A L Q S L T A G L I E S R P G V G T F V R A Y  
gil4974740612|ref|WP\_009774810.1| D S T V G I V D S L R R L I A -- A S P D G A K L P S T R Q L V E H H A S P V T V Q A R L L A A E G V L S R P G V G T F V R S A  
gil502171414|ref|WP\_012725090.1| P L H V R L T S A L R S I A S G V P D G A A L P S R T L A R D L G C S R W A V T E A Y A Q L A V E G Y L T A R S G S V T R V S R  
gil502172270|ref|WP\_012725454.1| G V S A G L A E A I R S A A R S G A L R A G V M P S S R A L A E D L G V S R N T V T E A Y T Q L V A E G W L A T R Q C G S T W L A D R  
gil500046620|ref|WP\_011726938.1| ----- M R Q W I A -- G A P P G A Q L P S S R N V L V A O Y G A S P V T V A S A M R T L R G L G L I E T P G V G T F V R A T  
gil500048866|ref|WP\_011729584.1| G L R S G L E D A L T A V R S G R L A P G T R L P S S R A L A D L G V A R N T V A D A Y A L T A E G L I A T Q C G S T R V A H R  
gil500051323|ref|WP\_011731240.1| T A R E D L V T A L R D G I R S G R L G T G T V L P S S R V L A A D L G L A R N T V A E A Y A D L V A E G W L A S R Q A G T W Y A R T  
gil500050783|ref|WP\_011730770.1| R T R E A L D A V R D A I R S G R L V S G T R L P S S R A L A D L G V A R N T V A R A Y A L I A E G W L T S H G S H T V S R A R  
gil500047026|ref|WP\_011727744.1| - L S W L M D A V R S A I D G R L P G V R L P A T R T L A G E L A V S R G V V E A Y R L A D G L V S G R T G G S T V L Q R  
gil500106737|ref|WP\_011782742.1| G T K D A L I S A L R D A A R S G R L T A G T M L P S S R L A T D L G L A R N T V A E A Y A E L V A E G W L A S R Q A G T W Y A D V  
gil500221973|ref|WP\_011892079.1| G T R N A L V A A L R E A V R S G R L S A G T T L P S S R A L A D L G L A R N T V A D A Y A L V A E G W L A S R Q A G T W Y A D V  
gil499521917|ref|WP\_011208557.1| P S Y R S V A D L I A E Q I T A G R W A P G D R L P T H R Q L A A E F G I A I A T A T R A Y A L K R T G V V V G E P G R G T F V R D R  
gil499522004|ref|WP\_011208644.1| G L R R G L D L A L R E A V R T G R L A G T R L P S S R T L A A D L G I A R N T V A A Y A D L V A E G W L T A R Q A G T R A E R  
gil527104925|ref|WP\_020905997.1| G I R A A L L Q T L R D A I D S G L L K P G T R L P S S R T L A D L G V A R N T V A D C A Y L A A A G W L T A R Q C G S T V Y A T L  
gil506369167|ref|WP\_015888886.1| G V R A T L V S A L R E S I R S G R L V A G T T L P S S R T L A D L G V A R N T V A E A Y S L V A E G W L T A R Q C G S T R V A D R  
gil499525260|ref|WP\_011211900.1| P A Y L A L A E G I R L L I H D G R A P L G V A L P S E R D L A A T L G V S R T T I T S Y A L L R E H G Y L I S R Q C S R S T V A L P  
gil499917559|ref|WP\_011598293.1| P L Y R G L A D A L R E R A V D G S M A Y V R L P A E R L A E E L R L S R V T S A A Y A R L R E S G W A S A R Q C G S T F V A M P  
gil497875250|ref|WP\_010189406.1| A L P V Q I A E A L R T Q V A A G I L L P G E Q V P S T R S L A R D L G I S R G S V V T A Y E Q L T A E G Y L T A S V G S G T V I N P H  
gil499236586|ref|WP\_010934126.1| P I P T Q I A D H I R T L V R G L L K P G D H V P S T R A L S T Q L D I S R G S A V T A Y E Q L L A E G F L I A A R C S G C I N P D  
gil499323395|ref|WP\_011013887.1| S I P T Q L E Q I R R L V A R G I L T P G D P L P S S R L S T Q L G V S R G S V V T A Y D Q L A G E Y L S T A R C S G T I N P D  
gil488472011|ref|WP\_002515681.1| P L P V R I C E E V R L I M D G V L A P G D H L P S T R V L S A Q L R V S R G T V V A Y E Q L E A G Y L V A A A G S G Q I N P D  
gil50652100|ref|WP\_015771875.1| P L A A H L A T Q I R T L T I S G A L A P G D A I P S T R T L A A Q L T V S R G T V V A A Y D Q L I A E G F L L T R P G A T I V H P G  
gil501365623|ref|WP\_012397189.1| P L G E Q L V R Q V R D L V A R G V L R P G D P L P S S R A L A A R L G T S R G T V T A A W D V L T G E Y L V A D R Q A T R I P S -  
gil501362559|ref|WP\_012394125.1| G G A E I A A S I E S A I S Q G G L P G D A L P S I R E V A G L G V N P N T V A A A Y R L R D R G T V E T A G R R G T V R D R  
gil499297137|ref|WP\_010988395.1| R R A E I A A S V E R A V S G E L E P Q G L L P M R E L A Q L G V N P N T V A A A Y R L R E R G V I E T A G R R G S R V R P K  
gil499297110|ref|WP\_010988368.1| T T A K G I A S S V E R G V S E G A L P G A A L P V R R L A D E L G V S P G T V A T A Y K L R R R G I V V T R G R G G T V V A A A  
gil499338038|ref|WP\_011027746.1| R G A A E I A S V E R A V S G E L E P Q G L P M R E L A Q R L G V N P N T V A A A Y R L R E R G V I E T A G R R G S R V R A K  
gil5013350123|ref|WP\_012381758.1| R R A E I A A S V E R G V S G D L P G H V L P M R E L A A R L E V N P N T V A A A Y R L R E R G V I E T A G R R G S R V R P A  
gil502770165|ref|WP\_013005149.1| R R A A D I A A S V E R A V A G L P P Q G L L P M R E L A E R L G V N A N T V A A A Y R L R E R G V I E T A G R R G S R V R P R  
gil506262604|ref|WP\_015745979.1| L A Q L A D G L R A A A I A G V L R P G D R L P S T R S L S A Q L E L S R T V C A A A Y D O L L A E G W L A T R R G S G T F V V G D  
gil500080888|ref|WP\_011756901.1| P L G V Q L S G R I R D L V L A G T L A R G D R L P S T R A L A E L G V S R A V T E Q A Y E Q L L A E G W L A T A R C A G T F V A A D  
gil506284908|ref|WP\_015804683.1| P L A A Q L A D A L R A A A A D G L R S G D R L P S T R A L A K E L A V S R T V T A A Y E Q L H A E G W I A G R H G S G T Y T T T  
gil502463933|ref|WP\_012796400.1| P L V Q L A D A L R E A A S A G H L R G D R L P S T R A L A S L G V S R A V T A A Y E Q L H A E G W I G R H G S G T Y T T S  
gil500204731|ref|WP\_011874959.1| P L A V Q L A D A L R A A S A Q L R G D R L P S T R A F A R H L A V S R T V T A A Y E Q L H A E G W I V G H G S G T Y T T T  
gil499524911|ref|WP\_011211551.1| P L A V Q V A D A L R A A A T G L A R G D R L P S T R A L A Q R L A I S R S V T A A A Y E Q L H A E G W I D G R H G S G T Y T T T  
gil527108988|ref|WP\_020909724.1| A L P I Q I A D H L R A D I R S G K A A G L R L P S S R K L A A E L E V A R G V V E R A Y E Q L I A E G W L A V H G S G T F V A E A  
gil501998886|ref|WP\_012688192.1| P L R H R I A E S I L D E I R G G R L P G D P L P S T R A L A H H L T V A R A S V V D A Y D L C S S Y A N A R A G S G R I A G  
gil497463899|ref|WP\_009778097.1| P L R H R I A D A I V L E R E G R L R P G D L P S T R V L A T E L K V S R G V V A A Y L A A A G F I E T R P G S G A I A P G  
gil502487431|ref|WP\_012803696.1| G T A A E I A E S V R T L V D R G D L A P G D L P P V R A L A A R L G I H R N T A V A A Y R T L A G A G I V V T R G A R G T R V A A R  
gil499499281|ref|WP\_011185921.1| T T A S E I A A S V E R L E R G L H G T L P V R E L A T Q L G I R N N T A V A A Y R L L A Q A G V V V R G R A G T V I A E R  
gil518576872|ref|WP\_019747079.1| D S S R I V A A L R E W I A -- T A P P G A K L P S T R S L V L H G A S P V T V Q K A L R T L S G V V E A R P G V G T F V R A A  
gil499918301|ref|WP\_011599035.1| P A Y R R L Y E Q L R A G I L S Q L K A G S P L A S R R L A E V G V S R N T V L A A F E Q L D A E G Y L D R R P G S G T V Y A D V  
gil500202582|ref|WP\_011873709.1| D S S K I V A E L R A W L A -- G A P P G A K L P S T R L V A O Y G A S P V T V Q K A L R T L S G V V E S R P G V G T F V R A V  
gil497629823|ref|WP\_009944807.1| K R G T V E N E L R G A I R D G L P G S R V P S T R A L A Q L G L S R G T V A A A Y L N V A E G Y L I A R G S G T V T S H  
gil497629930|ref|WP\_009944114.1| A D S R G L A A A L T A I R A G L A G S V R P S T R A L A Q D F I A R G T V T R A Y E Q L V E G F L L S R Q A P T I V A A R  
gil506230120|ref|WP\_015749895.1| - K A G W L A D R I A A A V D R R L R P G D R L P A G T R L A A D L G V S R G V V T E A Y R L L D D G L V V T A G R G T V A A A  
gil501347029|ref|WP\_012378664.1| K D F R S V A D A V A E E I A A G R L K A G E R L P P O R E F A R L H A I A D S T A S R V Q L A R R G L T V G V G R G T F V T E A  
gil502767162|ref|WP\_013002146.1| A D Y R R I A D R I A D D I A A G R L P G D R L P O R V F A R R R G I A G T A G R V A Y L R V R G L V V G V G R G T F V R A A  
gil501349995|ref|WP\_012381630.1| S S V A E L V T S L R S E L N -- R Y S P G G K L P S S R A L V E R F R V S P V T V S R A L A L A A E G L V V T R P C A G A F R A R P  
gil502769949|ref|WP\_013004933.1| S S Q A E L A E Q L K K E L D -- R Y S P G G K L P S S R A L V E R F R V S P V T V S R A L A L A A E G L V V T R P C A G A F R A R P  
gil499293600|ref|WP\_010984858.1| G I R R G L T E A L R E A V R G R L A P G T R L P S S R L A A D L G I A R N T V A E A Y A D L V A E G W L T A R Q C S G T V A R R  
gil499266399|ref|WP\_010987657.1| G R R A S L I R A L R E A V R S G R L A P G T R L P S R L A A D L G V A R N T V A D A Y A L V A E G W L A T A R Q C G S T R V A D R  
gil499297202|ref|WP\_010988460.1| A R G R G L Q A A L T A V R S G R L A P G T R L P S R L A A D L G V S R G L V T E A Y E Q L T A E G Y L R S R G A G T W Y G G A  
gil499294400|ref|WP\_010985658.1| G R R A G L R A L R D A V R D R L A P G T R L P A T R L A E L G I S R G T A K A A Y D L V A E G Y L T A R Q A G T E V A A L  
gil501347758|ref|WP\_012379393.1| G L R S G L M E A L R D A V R T G R L P G T R L P S S R A L A A D L G V A R N T V A D A Y A L V A E G W L A T A R Q C G S T R V A Q R  
gil501349598|ref|WP\_012381233.1| N R R A L L M P A L R E A V R S G R L A P G A R L P S R L A A D L G L A R N T V A D A Y A L V A E G W L A A R Q C S G T R V A E R  
gil501350189|ref|WP\_012381824.1| G R G R A L R S A L R E A V R S G R L A A G T R L P S S R L A A D L G V S R G L V T E A Y E Q L T A E G Y L S R S R G A G T V W S E G  
gil502770230|ref|WP\_013005214.1| A R G R T L Q A A L R E A I R S G R L S R G T R L P A S R A L A A D L G V S R G L V T E A Y E Q L V A E G Y L R S S R G S G T W Y G S A  
gil502066522|ref|WP\_012690540.1| P L Y R Q V R A A I E H G I A N G L F D P R H Q L P S S R E L A V D L A I S R N T I N L A Y Q L I A E G L V S H Q R S G M F V N D  
gil446066881|ref|WP\_000143936.1| F O Y Q V L L A Q I A H R I Y Q D E L P H K Q L L I R D F A R Q Q I L S T A K S C Y L L E A R G L I Y V P K S G Y F V A R  
gil446121445|ref|WP\_000199300.1| T R Y Q H L A T L A E A I E Q G L Y R H G E K L P S V R S L S Q E H G V S I S T V Q A Y Q T L E T M K L I T P P R S G Y F V A Q R  
gil446200194|ref|WP\_000278049.1| T K I E F V I S Q I E Q Q I K N R S L P G T R L P S V R K L A K D L G F V S T I V E A Y E R L I A L G K I E S R G S G Y F V A P  
gil446200407|ref|WP\_00027862.1| Y K I E Q L S I H Q I R Q L E I S G T L N A H K L P S R L D Q V Q R G F S L M T V M N A Y Q L E S G L I Y S E K S G Y F V A E Q  
gil446487260|ref|WP\_000565119.1| K T A N E I F D S I R Q H I I A G T L R A E D S L P V R E L A S E L K V N R N T V A A A Y L R E G I T A G L A Q S L R G N G T I Y K G S  
gil446683285|ref|WP\_000760626.1| K Y K Q L A E Q L R E Q I A S G I W Q P G D R L P S R L D Q V A L S G M S F M T V S H A Y Q L L S G I I A R P Q S G Y Y A P K  
gil446683346|ref|WP\_000760692.1| K K Y Q R L A E Q I R E Q I A S G V W Q P G D R L P S R E Q V A S G M S F M T V G H A Y Q L L S G R I I A R P Q S G Y Y A P H  
gil447061203|ref|WP\_001138459.1| P R Y Q H I A R Q L K T A I E Q G E L A P G T R L P S R T W A Q E L G V S R A T V E N A Y G L V A G W L E R Q A G T F V S N A  
gil447179906|ref|WP\_001257162.1| K L H R L F R C L G A I I D G V I Q P K T R L P A S D L W A E I H V S R N T V L S A Y E Q L A E G Y L E A R T G H G T W Y A E K  
gil487815862|ref|WP\_001889328.1| K K S Q V L A N T I K S Q I E Q N I W L S E K I



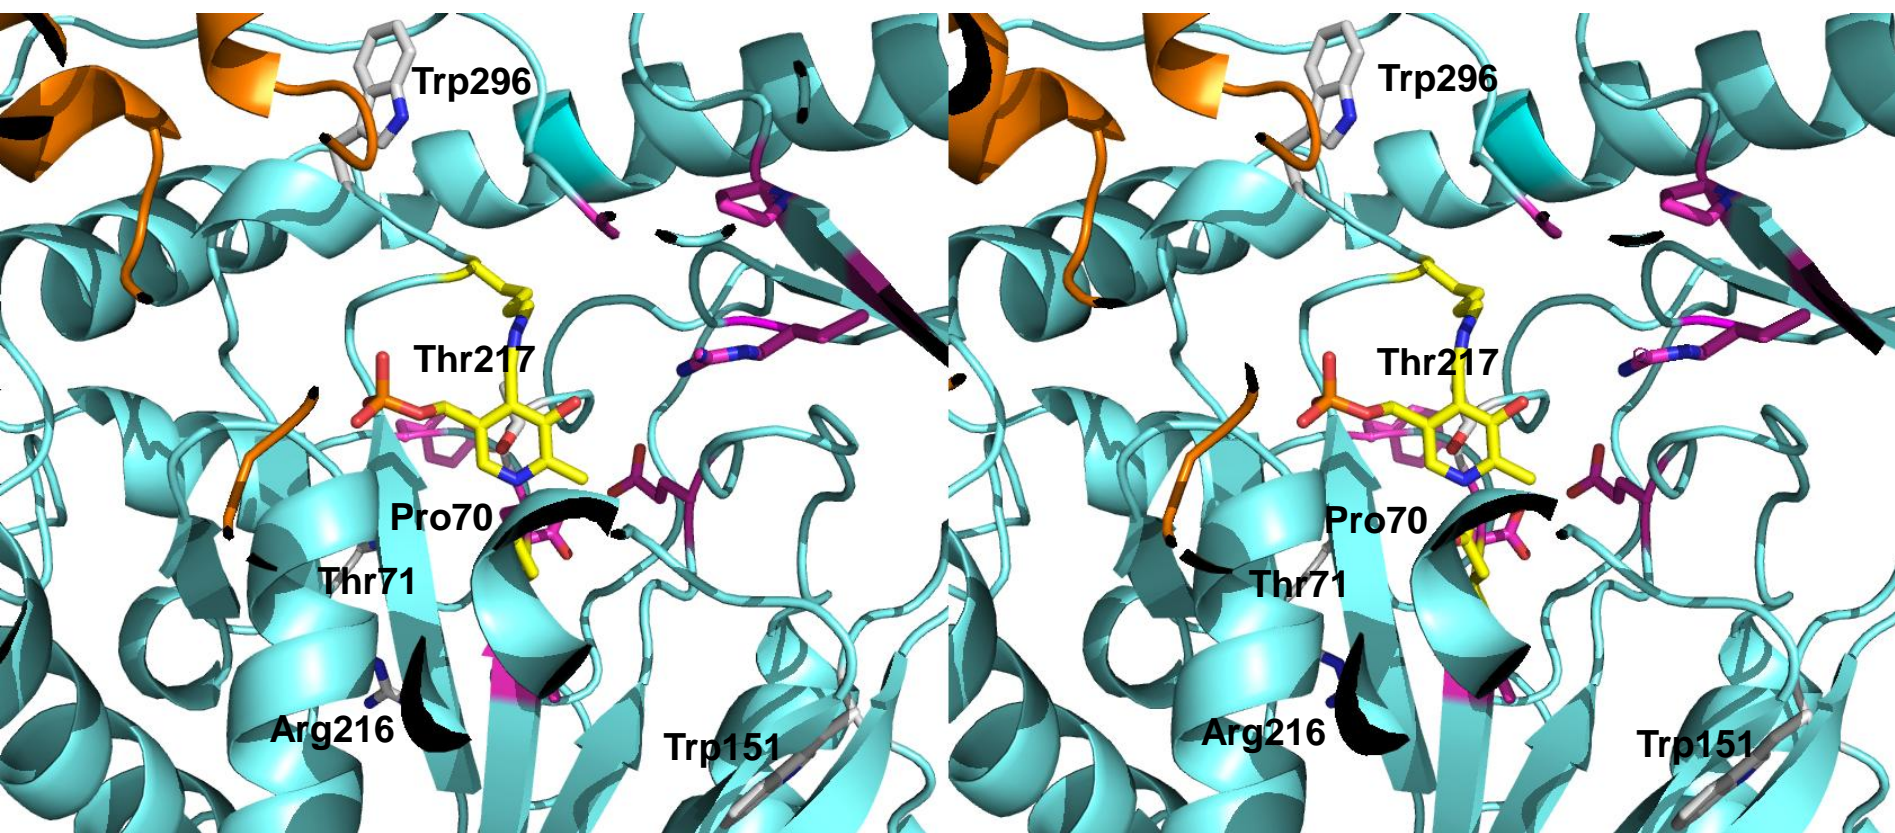

Supporting Figure S3A

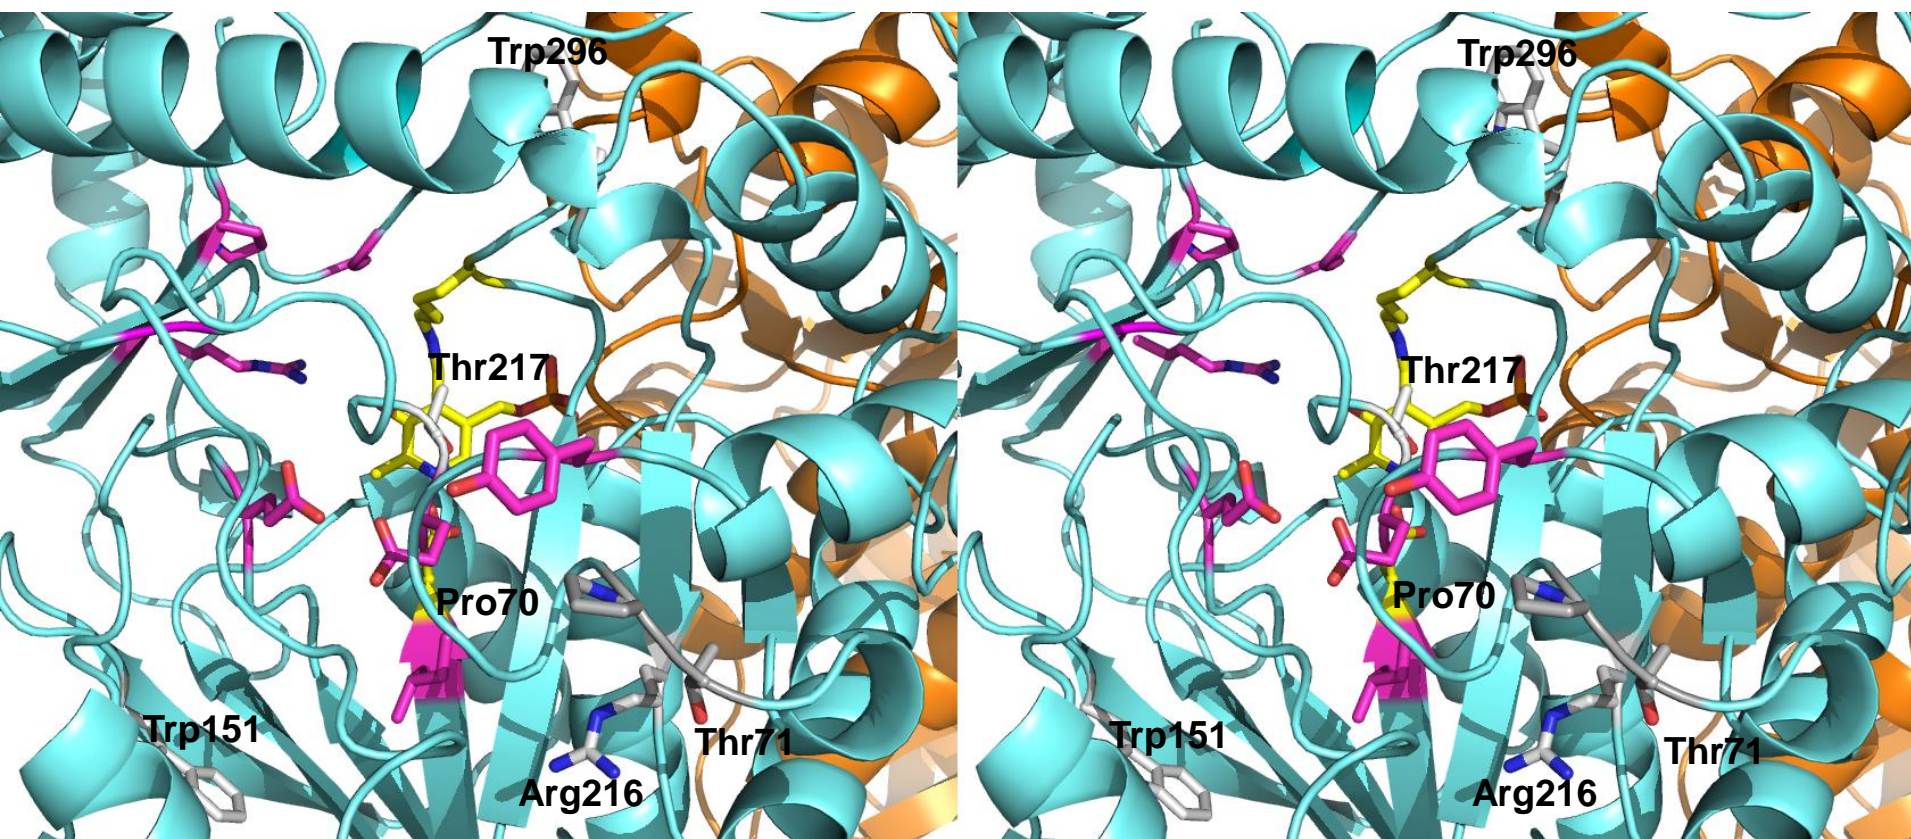

**Supporting Figure S3B**

## Supplementary Information Table S1

List of MocR regulators not predicted to regulate DUF161-containing genes extracted from the RegPrecise data bank (MocR/other RegPrecise set).

| RefSeq code    | Specie                                                           | Phylum              |
|----------------|------------------------------------------------------------------|---------------------|
| AHW95383.1     | <i>Enterobacter asburiae</i> L1                                  | Gammaproteobacteria |
| YP_007388940.1 | <i>Enterobacter aerogenes</i> EA1509E                            | Gammaproteobacteria |
| YP_004592771.1 | <i>Enterobacter aerogenes</i> KCTC 2190                          | Gammaproteobacteria |
| YP_001334103.1 | <i>Klebsiella pneumoniae</i> subsp. <i>pneumoniae</i> MGH 78578  | Gammaproteobacteria |
| YP_005953387.1 | <i>Klebsiella pneumoniae</i> KCTC 2242                           | Gammaproteobacteria |
| AJB33817.1     | <i>Klebsiella pneumoniae</i> HK787                               | Gammaproteobacteria |
| YP_003611728.1 | <i>Enterobacter cloacae</i> subsp. <i>cloacae</i> ATCC 13047     | Gammaproteobacteria |
| YP_004827492.1 | <i>Enterobacter asburiae</i> LF7a                                | Gammaproteobacteria |
| AHE45995.1     | <i>Klebsiella pneumoniae</i> subsp. <i>pneumoniae</i> Kp13       | Gammaproteobacteria |
| YP_007845935.1 | <i>Enterobacter cloacae</i> subsp. <i>cloacae</i> NCTC 9394      | Gammaproteobacteria |
| YP_002918142.1 | <i>Klebsiella pneumoniae</i> subsp. <i>pneumoniae</i> NTUH-K2044 | Gammaproteobacteria |
| YP_006637640.1 | <i>Klebsiella pneumoniae</i> subsp. <i>pneumoniae</i> 1084       | Gammaproteobacteria |
| AIK80736.1     | <i>Klebsiella pneumoniae</i> subsp. <i>pneumoniae</i>            | Gammaproteobacteria |
| YP_005225463.1 | <i>Klebsiella pneumoniae</i> subsp. <i>pneumoniae</i> HS11286    | Gammaproteobacteria |
| YP_008426895.1 | <i>Klebsiella pneumoniae</i> JM45                                | Gammaproteobacteria |
| AHI34646.1     | <i>Klebsiella pneumoniae</i> ATCC BAA-2146                       | Gammaproteobacteria |
| AHM81002.1     | <i>Klebsiella pneumoniae</i> 30684/NJST258_2                     | Gammaproteobacteria |
| AHM86676.1     | <i>Klebsiella pneumoniae</i> 30660/NJST258_1                     | Gammaproteobacteria |
| YP_003440871.1 | <i>Klebsiella variicola</i> At-22                                | Gammaproteobacteria |
| YP_002240059.1 | <i>Klebsiella pneumoniae</i> 342                                 | Gammaproteobacteria |
| YP_006476484.1 | <i>Enterobacter cloacae</i> subsp. <i>dissolvens</i> SDM         | Gammaproteobacteria |
| AHW90325.1     | <i>Klebsiella oxytoca</i> HKOPL1                                 | Gammaproteobacteria |
| YP_005018537.1 | <i>Klebsiella oxytoca</i> KCTC 1686                              | Gammaproteobacteria |
| YP_006497050.1 | <i>Klebsiella oxytoca</i> E718                                   | Gammaproteobacteria |
| YP_007874856.1 | <i>Raoultella ornithinolytica</i> B6                             | Gammaproteobacteria |
| YP_001438889.1 | <i>Cronobacter sakazakii</i> ATCC BAA-894                        | Gammaproteobacteria |
| YP_006343997.1 | <i>Cronobacter sakazakii</i> ES15                                | Gammaproteobacteria |
| YP_007441558.1 | <i>Cronobacter sakazakii</i> SP291                               | Gammaproteobacteria |
| YP_001175660.1 | <i>Enterobacter</i> sp. 638                                      | Gammaproteobacteria |
| YP_008897761.1 | <i>Cronobacter sakazakii</i> CMCC 45402                          | Gammaproteobacteria |
| YP_006577561.1 | <i>Enterobacter cloacae</i> subsp. <i>cloacae</i> ENHKU01        | Gammaproteobacteria |

|                |                                                                 |                     |
|----------------|-----------------------------------------------------------------|---------------------|
| YP_004950843.1 | <i>Enterobacter cloacae</i> EcWSU1                              | Gammaproteobacteria |
| AIA40830.1     | <i>Klebsiella pneumoniae</i> subsp. <i>pneumoniae</i> KPNIH27   | Gammaproteobacteria |
| AIV28670.1     | <i>Enterobacter cloacae</i>                                     | Gammaproteobacteria |
| AHE71545.1     | <i>Enterobacter cloacae</i> P101                                | Gammaproteobacteria |
| YP_008659001.1 | <i>Klebsiella pneumoniae</i> CG43                               | Gammaproteobacteria |
| AIE62943.1     | <i>Enterobacter cloacae</i> ECNIH2                              | Gammaproteobacteria |
| AIG83319.1     | <i>Klebsiella pneumoniae</i> subsp. <i>pneumoniae</i> PittNDM01 | Gammaproteobacteria |
| AIA35468.1     | <i>Klebsiella pneumoniae</i> subsp. <i>pneumoniae</i> KPNIH10   | Gammaproteobacteria |
| AID98003.1     | <i>Klebsiella pneumoniae</i> subsp. <i>pneumoniae</i> KPNIH24   | Gammaproteobacteria |
| AIE21782.1     | <i>Klebsiella pneumoniae</i> subsp. <i>pneumoniae</i> KPNIH1    | Gammaproteobacteria |
| AIE27161.1     | <i>Klebsiella pneumoniae</i> subsp. <i>pneumoniae</i> KPR0928   | Gammaproteobacteria |
| KEF78156.1     | <i>Klebsiella pneumoniae</i> UHKPC45                            | Gammaproteobacteria |
| AIE02062.1     | <i>Klebsiella pneumoniae</i> subsp. <i>pneumoniae</i> KP5-1     | Gammaproteobacteria |
| AIN27052.1     | <i>Enterobacter cloacae</i> ECR091                              | Gammaproteobacteria |
| AIN21709.1     | <i>Enterobacter cloacae</i> ECNIH3                              | Gammaproteobacteria |
| AIE69070.1     | <i>Klebsiella oxytoca</i>                                       | Gammaproteobacteria |
| AID88783.1     | <i>Klebsiella oxytoca</i> KONIH1                                | Gammaproteobacteria |
| YP_008109897.1 | <i>Enterobacter</i> sp. R4-368                                  | Gammaproteobacteria |
| YP_006320668.1 | <i>Shimwellia blattae</i> DSM 4481 = NBRC 105725                | Gammaproteobacteria |
| YP_003942871.1 | <i>Enterobacter lignolyticus</i> SCF1                           | Gammaproteobacteria |
| YP_003209418.1 | <i>Cronobacter turicensis</i> z3032                             | Gammaproteobacteria |
| YP_001454243.1 | <i>Citrobacter koseri</i> ATCC BAA-895                          | Gammaproteobacteria |
| AIR02582.1     | <i>Pluralibacter gergoviae</i>                                  | Gammaproteobacteria |
| AHY12291.1     | <i>Citrobacter freundii</i> CFNIH1                              | Gammaproteobacteria |
| YP_002131951.1 | <i>Phenylobacterium zucineum</i> HLK1                           | Alphaproteobacteria |
| YP_004554237.1 | <i>Sphingobium chlorophenolicum</i> L-1                         | Alphaproteobacteria |
| YP_003543498.1 | <i>Sphingobium japonicum</i> UT26S                              | Alphaproteobacteria |
| YP_006660698.1 | <i>Arthrobacter</i> sp. Rue61a                                  | Actinobacteria      |
| YP_946574.1    | <i>Arthrobacter aurescens</i> TC1                               | Actinobacteria      |
| YP_830119.1    | <i>Arthrobacter</i> sp. FB24                                    | Actinobacteria      |
| YP_002486834.1 | <i>Arthrobacter chlorophenolicus</i> A6                         | Actinobacteria      |
| YP_004407006.1 | <i>Verrucosispora maris</i> AB-18-032                           | Actinobacteria      |
| AJF64107.1     | <i>Streptomyces vietnamensis</i>                                | Actinobacteria      |
| YP_007858151.1 | <i>Streptomyces</i> sp. PAMC26508                               | Actinobacteria      |
| YP_004926369.1 | <i>Streptomyces pratensis</i> ATCC 33331                        | Actinobacteria      |

|                |                                                                    |                |
|----------------|--------------------------------------------------------------------|----------------|
| YP_006876554.1 | <i>Streptomyces venezuelae</i> ATCC 10712                          | Actinobacteria |
| YP_004572947.1 | <i>Microthricus phosphovorans</i> NM-1                             | Actinobacteria |
| YP_001109088.1 | <i>Saccharopolyspora erythraea</i> NRRL 2338                       | Actinobacteria |
| AIJ20481.1     | <i>Amycolatopsis methanolica</i> 239                               | Actinobacteria |
| YP_008009425.1 | <i>Amycolatopsis orientalis</i> HCCB10007                          | Actinobacteria |
| AIG80292.1     | <i>Amycolatopsis japonica</i>                                      | Actinobacteria |
| YP_003493098.1 | <i>Streptomyces scabiei</i> 87.22                                  | Actinobacteria |
| YP_003837530.1 | <i>Micromonospora aurantiaca</i> ATCC 27029                        | Actinobacteria |
| YP_004083524.1 | <i>Micromonospora</i> sp. L5                                       | Actinobacteria |
| YP_004813141.1 | <i>Streptomyces violaceusniger</i> Tu 4113                         | Actinobacteria |
| YP_007525677.1 | <i>Streptomyces davawensis</i> JCM 4913                            | Actinobacteria |
| YP_001827627.1 | <i>Streptomyces griseus</i> subsp. <i>griseus</i> NBRC 13350       | Actinobacteria |
| YP_003762641.1 | <i>Amycolatopsis mediterranei</i> U32                              | Actinobacteria |
| YP_008456750.1 | <i>Amycolatopsis mediterranei</i> RB                               | Actinobacteria |
| YP_006546898.1 | <i>Amycolatopsis mediterranei</i> S699                             | Actinobacteria |
| YP_007929801.1 | <i>Streptomyces fulvissimus</i> DSM 40593                          | Actinobacteria |
| AIA07543.1     | <i>Streptomyces albulus</i>                                        | Actinobacteria |
| YP_007042244.1 | <i>Saccharothrix espanaensis</i> DSM 44229                         | Actinobacteria |
| YP_004960546.1 | <i>Streptomyces bingchenggensis</i> BCW-1                          | Actinobacteria |
| YP_008788370.1 | <i>Streptomyces rapamycinicus</i> NRRL 5491                        | Actinobacteria |
| NP_828105.1    | <i>Streptomyces avermitilis</i> MA-4680 = NBRC 14893               | Actinobacteria |
| YP_007291946.1 | <i>Mycobacterium smegmatis</i> JS623                               | Actinobacteria |
| YP_004907467.1 | <i>Kitasatospora setae</i> KM-6054                                 | Actinobacteria |
| YP_006243999.1 | <i>Streptomyces hygroscopicus</i> subsp. <i>jinggangensis</i> 5008 | Actinobacteria |
| YP_004801302.1 | <i>Streptomyces</i> sp. <i>SirexAA-E</i>                           | Actinobacteria |
| YP_007691616.1 | <i>Streptomyces hygroscopicus</i> subsp. <i>jinggangensis</i> TL01 | Actinobacteria |
| YP_007748739.1 | <i>Streptomyces albus</i> J1074                                    | Actinobacteria |
| AIY00251.1     | <i>Arthrobacter</i> sp. PAMC25486                                  | Actinobacteria |
| AIR42385.1     | <i>Mycobacterium abscessus</i> subsp. <i>bolletii</i>              | Actinobacteria |
| AJE86892.1     | <i>Streptomyces albus</i>                                          | Actinobacteria |
| YP_008733376.1 | <i>Actinoplanes friuliensis</i> DSM 7358                           | Actinobacteria |
| AHI01771.1     | <i>Kutzneria albida</i> DSM 43870                                  | Actinobacteria |
| YP_001538203.1 | <i>Salinispora arenicola</i> CNS-205                               | Actinobacteria |
| YP_003104432.1 | <i>Actinosynnema mirum</i> DSM 43827                               | Actinobacteria |
| YP_006452271.1 | <i>Mycobacterium chubuense</i> NBB4                                | Actinobacteria |

|                |                                                                        |                |
|----------------|------------------------------------------------------------------------|----------------|
| YP_006057292.1 | <i>Streptomyces cattleya</i> NRRL 8057 = DSM 46488                     | Actinobacteria |
| YP_008385100.1 | <i>Streptomyces collinus</i> Tu 365                                    | Actinobacteria |
| NP_625699.1    | <i>Streptomyces coelicolor</i> A3(2)                                   | Actinobacteria |
| AIJ17027.1     | <i>Streptomyces lividans</i> TK24                                      | Actinobacteria |
| YP_001159996.1 | <i>Salinispora tropica</i> CNB-440                                     | Actinobacteria |
| YP_008906570.1 | <i>Mycobacterium neoaurum</i> VKM Ac-1815D                             | Actinobacteria |
| AIU12919.1     | <i>Mycobacterium smegmatis</i>                                         | Actinobacteria |
| YP_952905.1    | <i>Mycobacterium vanbaalenii</i> PYR-1                                 | Actinobacteria |
| YP_006565789.1 | <i>Mycobacterium smegmatis</i> str. MC2 155                            | Actinobacteria |
| YP_001135532.1 | <i>Mycobacterium gilvum</i> PYR-GCK                                    | Actinobacteria |
| YP_005461289.1 | <i>Actinoplanes missouriensis</i> 431                                  | Actinobacteria |
| AIR97161.1     | <i>Streptomyces glaucescens</i>                                        | Actinobacteria |
| YP_004078064.1 | <i>Mycobacterium gilvum</i> Spyr1                                      | Actinobacteria |
| YP_003679346.1 | <i>Nocardiopsis dassonvillei</i> subsp. <i>dassonvillei</i> DSM 43111  | Actinobacteria |
| YP_001070114.1 | <i>Mycobacterium</i> sp. JLS                                           | Actinobacteria |
| YP_639019.1    | <i>Mycobacterium</i> sp. MCS                                           | Actinobacteria |
| YP_937891.1    | <i>Mycobacterium</i> sp. KMS                                           | Actinobacteria |
| YP_009038400.1 | <i>Mycobacterium abscessus</i> subsp. <i>bolletii</i> str. GO 06       | Actinobacteria |
| YP_003637187.1 | <i>Cellulomonas flavigena</i> DSM 20109                                | Actinobacteria |
| YP_004453718.1 | <i>Cellulomonas fimi</i> ATCC 484                                      | Actinobacteria |
| YP_008023793.1 | <i>Mycobacterium abscessus</i> subsp. <i>bolletii</i> 50594            | Actinobacteria |
| YP_004600492.1 |                                                                        | Actinobacteria |
| YP_001704117.1 | <i>Mycobacterium abscessus</i>                                         | Actinobacteria |
| CAM63463.1     | <i>Mycobacterium abscessus</i> ATCC 19977                              | Actinobacteria |
| AIV12145.1     | <i>Mycobacterium abscessus</i> subsp. <i>bolletii</i>                  | Actinobacteria |
| AIR34547.1     | <i>Mycobacterium abscessus</i> subsp. <i>bolletii</i> 103              | Actinobacteria |
| YP_005003649.1 | <i>Mycobacterium rhodesiae</i> NBB3                                    | Actinobacteria |
| YP_001221503.1 | <i>Clavibacter michiganensis</i> subsp. <i>michiganensis</i> NCPPB 382 | Actinobacteria |
| YP_001709783.1 | <i>Clavibacter michiganensis</i> subsp. <i>sepedonicus</i>             | Actinobacteria |
| YP_006643068.1 | <i>Nocardiopsis alba</i> ATCC BAA-2165                                 | Actinobacteria |
| YP_007685022.1 | <i>Clavibacter michiganensis</i> subsp. <i>nebraskensis</i> NCPPB 2581 | Actinobacteria |
| YP_003383453.1 | <i>Kribbella flavida</i> DSM 17836                                     | Actinobacteria |
| YP_004098585.1 | <i>Intrasporangium calvum</i> DSM 43043                                | Actinobacteria |
| YP_002883927.1 | <i>Beutenbergia cavernae</i> DSM 12333                                 | Actinobacteria |
| YP_003299852.1 | <i>Thermomonospora curvata</i> DSM 43183                               | Actinobacteria |

|                |                                                          |                       |
|----------------|----------------------------------------------------------|-----------------------|
| YP_924561.1    | <i>Nocardioides sp. JS614</i>                            | <i>Actinobacteria</i> |
| YP_003511470.1 | <i>Stackebrandtia nassauensis</i> DSM 44728              | <i>Actinobacteria</i> |
| YP_003202719.1 | <i>Nakamurella multipartita</i> DSM 44233                | <i>Actinobacteria</i> |
| YP_003341434.1 | <i>Streptosporangium roseum</i> DSM 43021                | <i>Actinobacteria</i> |
| YP_003658654.1 | <i>Segniliparus rotundus</i> DSM 44985                   | <i>Actinobacteria</i> |
| YP_004542484.1 | <i>Isoptericola variabilis</i> 225                       | <i>Actinobacteria</i> |
| YP_003648267.1 | <i>Tsukamurella paurometabola</i> DSM 20162              | <i>Actinobacteria</i> |
| YP_001363871.1 | <i>Kineococcus radiotolerans</i> SRS30216 = ATCC BAA-149 | <i>Actinobacteria</i> |

---

## Supplementary information Table S2

List of YczR extracted from the SynTax data bank (YczR SynTax).

| RefSeq code    | Specie                                                           | Phylum              |
|----------------|------------------------------------------------------------------|---------------------|
| AHW95383.1     | <i>Enterobacter asburiae</i> L1                                  | Gammaproteobacteria |
| YP_007388940.1 | <i>Enterobacter aerogenes</i> EA1509E                            | Gammaproteobacteria |
| YP_004592771.1 | <i>Enterobacter aerogenes</i> KCTC 2190                          | Gammaproteobacteria |
| YP_001334103.1 | <i>Klebsiella pneumoniae</i> subsp. <i>pneumoniae</i> MGH 78578  | Gammaproteobacteria |
| YP_005953387.1 | <i>Klebsiella pneumoniae</i> KCTC 2242                           | Gammaproteobacteria |
| AJB33817.1     | <i>Klebsiella pneumoniae</i> HK787                               | Gammaproteobacteria |
| YP_003611728.1 | <i>Enterobacter cloacae</i> subsp. <i>cloacae</i> ATCC 13047     | Gammaproteobacteria |
| YP_004827492.1 | <i>Enterobacter asburiae</i> LF7a                                | Gammaproteobacteria |
| AHE45995.1     | <i>Klebsiella pneumoniae</i> subsp. <i>pneumoniae</i> Kp13       | Gammaproteobacteria |
| YP_007845935.1 | <i>Enterobacter cloacae</i> subsp. <i>cloacae</i> NCTC 9394      | Gammaproteobacteria |
| YP_002918142.1 | <i>Klebsiella pneumoniae</i> subsp. <i>pneumoniae</i> NTUH-K2044 | Gammaproteobacteria |
| YP_006637640.1 | <i>Klebsiella pneumoniae</i> subsp. <i>pneumoniae</i> 1084       | Gammaproteobacteria |
| AIK80736.1     | <i>Klebsiella pneumoniae</i> subsp. <i>pneumoniae</i>            | Gammaproteobacteria |
| YP_005225463.1 | <i>Klebsiella pneumoniae</i> subsp. <i>pneumoniae</i> HS11286    | Gammaproteobacteria |
| YP_008426895.1 | <i>Klebsiella pneumoniae</i> JM45                                | Gammaproteobacteria |
| AHI34646.1     | <i>Klebsiella pneumoniae</i> ATCC BAA-2146                       | Gammaproteobacteria |
| AHM81002.1     | <i>Klebsiella pneumoniae</i> 30684/NJST258_2                     | Gammaproteobacteria |
| AHM86676.1     | <i>Klebsiella pneumoniae</i> 30660/NJST258_1                     | Gammaproteobacteria |
| YP_003440871.1 | <i>Klebsiella variicola</i> At-22                                | Gammaproteobacteria |
| YP_002240059.1 | <i>Klebsiella pneumoniae</i> 342                                 | Gammaproteobacteria |
| YP_006476484.1 | <i>Enterobacter cloacae</i> subsp. <i>dissolvens</i> SDM         | Gammaproteobacteria |
| AHW90325.1     | <i>Klebsiella oxytoca</i> HKOPL1                                 | Gammaproteobacteria |
| YP_005018537.1 | <i>Klebsiella oxytoca</i> KCTC 1686                              | Gammaproteobacteria |
| YP_006497050.1 | <i>Klebsiella oxytoca</i> E718                                   | Gammaproteobacteria |
| YP_007874856.1 | <i>Raoultella ornithinolytica</i> B6                             | Gammaproteobacteria |
| YP_001438889.1 | <i>Cronobacter sakazakii</i> ATCC BAA-894                        | Gammaproteobacteria |
| YP_006343997.1 | <i>Cronobacter sakazakii</i> ES15                                | Gammaproteobacteria |
| YP_007441558.1 | <i>Cronobacter sakazakii</i> SP291                               | Gammaproteobacteria |
| YP_001175660.1 | <i>Enterobacter</i> sp. 638                                      | Gammaproteobacteria |
| YP_008897761.1 | <i>Cronobacter sakazakii</i> CMCC 45402                          | Gammaproteobacteria |
| YP_006577561.1 | <i>Enterobacter cloacae</i> subsp. <i>cloacae</i> ENHKU01        | Gammaproteobacteria |
| YP_004950843.1 | <i>Enterobacter cloacae</i> EcWSU1                               | Gammaproteobacteria |

|                |                                                                 |                     |
|----------------|-----------------------------------------------------------------|---------------------|
| AIA40830.1     | <i>Klebsiella pneumoniae</i> subsp. <i>pneumoniae</i> KPNIH27   | Gammaproteobacteria |
| AIV28670.1     | <i>Enterobacter cloacae</i>                                     | Gammaproteobacteria |
| AHE71545.1     | <i>Enterobacter cloacae</i> P101                                | Gammaproteobacteria |
| YP_008659001.1 | <i>Klebsiella pneumoniae</i> CG43                               | Gammaproteobacteria |
| AIE62943.1     | <i>Enterobacter cloacae</i> ECNIH2                              | Gammaproteobacteria |
| AIG83319.1     | <i>Klebsiella pneumoniae</i> subsp. <i>pneumoniae</i> PittNDM01 | Gammaproteobacteria |
| AIA35468.1     | <i>Klebsiella pneumoniae</i> subsp. <i>pneumoniae</i> KPNIH10   | Gammaproteobacteria |
| AID98003.1     | <i>Klebsiella pneumoniae</i> subsp. <i>pneumoniae</i> KPNIH24   | Gammaproteobacteria |
| AIE21782.1     | <i>Klebsiella pneumoniae</i> subsp. <i>pneumoniae</i> KPNIH1    | Gammaproteobacteria |
| AIE27161.1     | <i>Klebsiella pneumoniae</i> subsp. <i>pneumoniae</i> KPR0928   | Gammaproteobacteria |
| KEF78156.1     | <i>Klebsiella pneumoniae</i> UHKPC45                            | Gammaproteobacteria |
| AIE02062.1     | <i>Klebsiella pneumoniae</i> subsp. <i>pneumoniae</i> KP5-1     | Gammaproteobacteria |
| AIN27052.1     | <i>Enterobacter cloacae</i> ECR091                              | Gammaproteobacteria |
| AIN21709.1     | <i>Enterobacter cloacae</i> ECNIH3                              | Gammaproteobacteria |
| AIE69070.1     | <i>Klebsiella oxytoca</i>                                       | Gammaproteobacteria |
| AID88783.1     | <i>Klebsiella oxytoca</i> KONIH1                                | Gammaproteobacteria |
| YP_008109897.1 | <i>Enterobacter</i> sp. R4-368                                  | Gammaproteobacteria |
| YP_006320668.1 | <i>Shimwellia blattae</i> DSM 4481 = NBRC 105725                | Gammaproteobacteria |
| YP_003942871.1 | <i>Enterobacter lignolyticus</i> SCF1                           | Gammaproteobacteria |
| YP_003209418.1 | <i>Cronobacter turicensis</i> z3032                             | Gammaproteobacteria |
| YP_001454243.1 | <i>Citrobacter koseri</i> ATCC BAA-895                          | Gammaproteobacteria |
| AIR02582.1     | <i>Pluralibacter gergoviae</i>                                  | Gammaproteobacteria |
| AHY12291.1     | <i>Citrobacter freundii</i> CFNIH1                              | Gammaproteobacteria |
| YP_002131951.1 | <i>Phenylobacterium zucineum</i> HLK1                           | Alphaproteobacteria |
| YP_004554237.1 | <i>Sphingobium chlorophenolicum</i> L-1                         | Alphaproteobacteria |
| YP_003543498.1 | <i>Sphingobium japonicum</i> UT26S                              | Alphaproteobacteria |
| YP_006660698.1 | <i>Arthrobacter</i> sp. Rue61a                                  | Actinobacteria      |
| YP_946574.1    | <i>Arthrobacter aureescens</i> TC1                              | Actinobacteria      |
| YP_830119.1    | <i>Arthrobacter</i> sp. FB24                                    | Actinobacteria      |
| YP_002486834.1 | <i>Arthrobacter chlorophenolicus</i> A6                         | Actinobacteria      |
| YP_004407006.1 | <i>Verrucosispora maris</i> AB-18-032                           | Actinobacteria      |
| AJF64107.1     | <i>Streptomyces vietnamensis</i>                                | Actinobacteria      |
| YP_007858151.1 | <i>Streptomyces</i> sp. PAMC26508                               | Actinobacteria      |
| YP_004926369.1 | <i>Streptomyces pratensis</i> ATCC 33331                        | Actinobacteria      |
| YP_006876554.1 | <i>Streptomyces venezuelae</i> ATCC 10712                       | Actinobacteria      |

|                |                                                                    |                |
|----------------|--------------------------------------------------------------------|----------------|
| YP_004572947.1 | <i>Microlunatus phosphovorius</i> NM-1                             | Actinobacteria |
| YP_001109088.1 | <i>Saccharopolyspora erythraea</i> NRRL 2338                       | Actinobacteria |
| AIJ20481.1     | <i>Amycolatopsis methanolica</i> 239                               | Actinobacteria |
| YP_008009425.1 | <i>Amycolatopsis orientalis</i> HCCB10007                          | Actinobacteria |
| AIG80292.1     | <i>Amycolatopsis japonica</i>                                      | Actinobacteria |
| YP_003493098.1 | <i>Streptomyces scabiei</i> 87.22                                  | Actinobacteria |
| YP_003837530.1 | <i>Micromonospora aurantiaca</i> ATCC 27029                        | Actinobacteria |
| YP_004083524.1 | <i>Micromonospora</i> sp. L5                                       | Actinobacteria |
| YP_004813141.1 | <i>Streptomyces violaceusniger</i> Tu 4113                         | Actinobacteria |
| YP_007525677.1 | <i>Streptomyces davawensis</i> JCM 4913                            | Actinobacteria |
| YP_001827627.1 | <i>Streptomyces griseus</i> subsp. <i>griseus</i> NBRC 13350       | Actinobacteria |
| YP_003762641.1 | <i>Amycolatopsis mediterranei</i> U32                              | Actinobacteria |
| YP_008456750.1 | <i>Amycolatopsis mediterranei</i> RB                               | Actinobacteria |
| YP_006546898.1 | <i>Amycolatopsis mediterranei</i> S699                             | Actinobacteria |
| YP_007929801.1 | <i>Streptomyces fulvissimus</i> DSM 40593                          | Actinobacteria |
| AIA07543.1     | <i>Streptomyces albulus</i>                                        | Actinobacteria |
| YP_007042244.1 | <i>Saccharothrix espanaensis</i> DSM 44229                         | Actinobacteria |
| YP_004960546.1 | <i>Streptomyces bingchenggensis</i> BCW-1                          | Actinobacteria |
| YP_008788370.1 | <i>Streptomyces rapamycinicus</i> NRRL 5491                        | Actinobacteria |
| NP_828105.1    | <i>Streptomyces avermitilis</i> MA-4680 = NBRC 14893               | Actinobacteria |
| YP_007291946.1 | <i>Mycobacterium smegmatis</i> JS623                               | Actinobacteria |
| YP_004907467.1 | <i>Kitasatospora setae</i> KM-6054                                 | Actinobacteria |
| YP_006243999.1 | <i>Streptomyces hygroscopicus</i> subsp. <i>jinggangensis</i> 5008 | Actinobacteria |
| YP_004801302.1 | <i>Streptomyces</i> sp. <i>SirexAA-E</i>                           | Actinobacteria |
| YP_007691616.1 | <i>Streptomyces hygroscopicus</i> subsp. <i>jinggangensis</i> TL01 | Actinobacteria |
| YP_007748739.1 | <i>Streptomyces albus</i> J1074                                    | Actinobacteria |
| AIY00251.1     | <i>Arthrobacter</i> sp. <i>PAMC25486</i>                           | Actinobacteria |
| AIR42385.1     | <i>Mycobacterium abscessus</i> subsp. <i>bolletii</i>              | Actinobacteria |
| AJE86892.1     | <i>Streptomyces albus</i>                                          | Actinobacteria |
| YP_008733376.1 | <i>Actinoplanes friuliensis</i> DSM 7358                           | Actinobacteria |
| AHI01771.1     | <i>Kutzneria albida</i> DSM 43870                                  | Actinobacteria |
| YP_001538203.1 | <i>Salinispora arenicola</i> CNS-205                               | Actinobacteria |
| YP_003104432.1 | <i>Actinosynnema mirum</i> DSM 43827                               | Actinobacteria |
| YP_006452271.1 | <i>Mycobacterium chubuense</i> NBB4                                | Actinobacteria |
| YP_006057292.1 | <i>Streptomyces cattleya</i> NRRL 8057 = DSM 46488                 | Actinobacteria |

|                |                                                                        |                |
|----------------|------------------------------------------------------------------------|----------------|
| YP_008385100.1 | <i>Streptomyces collinus</i> Tu 365                                    | Actinobacteria |
| NP_625699.1    | <i>Streptomyces coelicolor</i> A3(2)                                   | Actinobacteria |
| AIJ17027.1     | <i>Streptomyces lividans</i> TK24                                      | Actinobacteria |
| YP_001159996.1 | <i>Salinispora tropica</i> CNB-440                                     | Actinobacteria |
| YP_008906570.1 | <i>Mycobacterium neoaurum</i> VKM Ac-1815D                             | Actinobacteria |
| AIU12919.1     | <i>Mycobacterium smegmatis</i>                                         | Actinobacteria |
| YP_952905.1    | <i>Mycobacterium vanbaalenii</i> PYR-1                                 | Actinobacteria |
| YP_006565789.1 | <i>Mycobacterium smegmatis</i> str. MC2 155                            | Actinobacteria |
| YP_001135532.1 | <i>Mycobacterium gilvum</i> PYR-GCK                                    | Actinobacteria |
| YP_005461289.1 | <i>Actinoplanes missouriensis</i> 431                                  | Actinobacteria |
| AIR97161.1     | <i>Streptomyces glaucescens</i>                                        | Actinobacteria |
| YP_004078064.1 | <i>Mycobacterium gilvum</i> Spyr1                                      | Actinobacteria |
| YP_003679346.1 | <i>Nocardiopsis dassonvillei</i> subsp. <i>dassonvillei</i> DSM 43111  | Actinobacteria |
| YP_001070114.1 | <i>Mycobacterium</i> sp. JLS                                           | Actinobacteria |
| YP_639019.1    | <i>Mycobacterium</i> sp. MCS                                           | Actinobacteria |
| YP_937891.1    | <i>Mycobacterium</i> sp. KMS                                           | Actinobacteria |
| YP_009038400.1 | <i>Mycobacterium abscessus</i> subsp. <i>bolletii</i> str. GO 06       | Actinobacteria |
| YP_003637187.1 | <i>Cellulomonas flavigena</i> DSM 20109                                | Actinobacteria |
| YP_004453718.1 | <i>Cellulomonas fimi</i> ATCC 484                                      | Actinobacteria |
| YP_008023793.1 | <i>Mycobacterium abscessus</i> subsp. <i>bolletii</i> 50594            | Actinobacteria |
| WP_013883443.1 | <i>Cellvibrio gilvus</i>                                               | Actinobacteria |
| YP_001704117.1 | <i>Mycobacterium abscessus</i>                                         | Actinobacteria |
| CAM63463.1     | <i>Mycobacterium abscessus</i> ATCC 19977                              | Actinobacteria |
| AIV12145.1     | <i>Mycobacterium abscessus</i> subsp. <i>bolletii</i>                  | Actinobacteria |
| AIR34547.1     | <i>Mycobacterium abscessus</i> subsp. <i>bolletii</i> 103              | Actinobacteria |
| YP_005003649.1 | <i>Mycobacterium rhodesiae</i> NBB3                                    | Actinobacteria |
| YP_001221503.1 | <i>Clavibacter michiganensis</i> subsp. <i>michiganensis</i> NCPPB 382 | Actinobacteria |
| YP_001709783.1 | <i>Clavibacter michiganensis</i> subsp. <i>sepedonicus</i>             | Actinobacteria |
| YP_006643068.1 | <i>Nocardiopsis alba</i> ATCC BAA-2165                                 | Actinobacteria |
| YP_007685022.1 | <i>Clavibacter michiganensis</i> subsp. <i>nebraskensis</i> NCPPB 2581 | Actinobacteria |
| YP_003383453.1 | <i>Kribbella flavida</i> DSM 17836                                     | Actinobacteria |
| YP_004098585.1 | <i>Intrasporangium calvum</i> DSM 43043                                | Actinobacteria |
| YP_002883927.1 | <i>Beutenbergia cavernae</i> DSM 12333                                 | Actinobacteria |
| YP_003299852.1 | <i>Thermomonospora curvata</i> DSM 43183                               | Actinobacteria |
| YP_924561.1    | <i>Nocardioides</i> sp. JS614                                          | Actinobacteria |

|                |                                                          |                       |
|----------------|----------------------------------------------------------|-----------------------|
| YP_003511470.1 | <i>Stackebrandtia nassauensis</i> DSM 44728              | <i>Actinobacteria</i> |
| YP_003202719.1 | <i>Nakamurella multipartita</i> DSM 44233                | <i>Actinobacteria</i> |
| YP_003341434.1 | <i>Streptosporangium roseum</i> DSM 43021                | <i>Actinobacteria</i> |
| YP_003658654.1 | <i>Segniliparus rotundus</i> DSM 44985                   | <i>Actinobacteria</i> |
| YP_004542484.1 | <i>Isoptericola variabilis</i> 225                       | <i>Actinobacteria</i> |
| YP_003648267.1 | <i>Tsukamurella paurometabola</i> DSM 20162              | <i>Actinobacteria</i> |
| YP_001363871.1 | <i>Kineococcus radiotolerans</i> SRS30216 = ATCC BAA-149 | <i>Actinobacteria</i> |

---

### Supplementary information Table S3

**Non redundant dataset of organisms containing putative YczR regulons used for the detection of DNA-binding motifs.**

| Specie                                                                 | Phylum         | Intergenic region<br>length |
|------------------------------------------------------------------------|----------------|-----------------------------|
| <i>Actinoplanes friuliensis</i> DSM 7358                               | Actinobacteria | 60                          |
| <i>Actinosynnema mirum</i> DSM 43827                                   | Actinobacteria | 62                          |
| <i>Amycolatopsis japonica</i>                                          | Actinobacteria | 62                          |
| <i>Amycolatopsis mediterranei</i> U32                                  | Actinobacteria | 107                         |
| <i>Amycolatopsis methanolica</i> 239                                   | Actinobacteria | 114                         |
| <i>Amycolatopsis orientalis</i> HCCB10007                              | Actinobacteria | 62                          |
| <i>Arthrobacter aurescens</i> TC1                                      | Actinobacteria | 61                          |
| <i>Arthrobacter chlorophenolicus</i> A6                                | Actinobacteria | 61                          |
| <i>Arthrobacter</i> sp. PAMC25486                                      | Actinobacteria | 60                          |
| <i>Cellulomonas fimi</i> ATCC 484                                      | Actinobacteria | 251                         |
| <i>Cellvibrio gilvus</i>                                               | Actinobacteria | 217                         |
| <i>Clavibacter michiganensis</i> subsp. <i>michiganensis</i> NCPPB 382 | Actinobacteria | 63                          |
| <i>Intrasporangium calvum</i> DSM 43043                                | Actinobacteria | 63                          |
| <i>Isoptericola variabilis</i> 225                                     | Actinobacteria | 62                          |
| <i>Kineococcus radiotolerans</i> SRS30216 = ATCC BAA-149               | Actinobacteria | 62                          |
| <i>Kribbella flavida</i> DSM 17836                                     | Actinobacteria | 62                          |
| <i>Kutzneria albida</i> DSM 43870                                      | Actinobacteria | 62                          |
| <i>Microlunatus phosphovorius</i> NM-1                                 | Actinobacteria | 115                         |
| <i>Micromonospora aurantiaca</i> ATCC 27029                            | Actinobacteria | 60                          |
| <i>Micromonospora</i> sp. L5                                           | Actinobacteria | 60                          |
| <i>Mycobacterium abscessus</i> subsp. <i>bolletii</i> 103              | Actinobacteria | 63                          |
| <i>Mycobacterium chubuense</i> NBB4                                    | Actinobacteria | 221                         |
| <i>Mycobacterium gilvum</i> PYR-GCK                                    | Actinobacteria | 219                         |
| <i>Mycobacterium neoaurum</i> VKM Ac-1815D                             | Actinobacteria | 27                          |
| <i>Mycobacterium rhodesiae</i> NBB3                                    | Actinobacteria | 215                         |
| <i>Mycobacterium smegmatis</i> str. MC2 155                            | Actinobacteria | 63                          |
| <i>Mycobacterium</i> sp. JLS                                           | Actinobacteria | 229                         |
| <i>Mycobacterium vanbaalenii</i> PYR-1                                 | Actinobacteria | 144                         |
| <i>Nakamurella multipartita</i> DSM 44233                              | Actinobacteria | 62                          |
| <i>Nocardioides</i> sp. JS614                                          | Actinobacteria | 62                          |
| <i>Saccharopolyspora erythraea</i> NRRL 2338                           | Actinobacteria | 62                          |
| <i>Saccharothrix espanaensis</i> DSM 44229                             | Actinobacteria | 63                          |
| <i>Salinispora arenicola</i> CNS-205                                   | Actinobacteria | 62                          |
| <i>Salinispora tropica</i> CNB-440                                     | Actinobacteria | 62                          |
| <i>Segniliparus rotundus</i> DSM 44985                                 | Actinobacteria | 114                         |
| <i>Stackebrandtia nassauensis</i> DSM 44728                            | Actinobacteria | 62                          |
| <i>Streptomyces albulus</i>                                            | Actinobacteria | 102                         |
| <i>Streptomyces albus</i>                                              | Actinobacteria | 114                         |
| <i>Streptomyces avermitilis</i> MA-4680 = NBRC 14893                   | Actinobacteria | 113                         |
| <i>Streptomyces bingchenggensis</i> BCW-1                              | Actinobacteria | 274                         |

|                                                                    |                     |     |
|--------------------------------------------------------------------|---------------------|-----|
| <i>Streptomyces coelicolor</i> A3(2)                               | Actinobacteria      | 103 |
| <i>Streptomyces collinus</i> Tu 365                                | Actinobacteria      | 103 |
| <i>Streptomyces davawensis</i> JCM 4913                            | Actinobacteria      | 101 |
| <i>Streptomyces fulvissimus</i> DSM 40593                          | Actinobacteria      | 103 |
| <i>Streptomyces glaucescens</i>                                    | Actinobacteria      | 99  |
| <i>Streptomyces griseus</i> subsp. <i>griseus</i> NBRC 13350       | Actinobacteria      | 103 |
| <i>Streptomyces hygroscopicus</i> subsp. <i>jinggangensis</i> 5008 | Actinobacteria      | 104 |
| <i>Streptomyces lividans</i> TK24                                  | Actinobacteria      | 67  |
| <i>Streptomyces pratensis</i> ATCC 33331                           | Actinobacteria      | 103 |
| <i>Streptomyces rapamycinicus</i> NRRL 5491                        | Actinobacteria      | 97  |
| <i>Streptomyces scabiei</i> 87.22                                  | Actinobacteria      | 195 |
| <i>Streptomyces</i> sp. <i>SirexAA-E</i>                           | Actinobacteria      | 100 |
| <i>Streptomyces venezuelae</i> ATCC 10712                          | Actinobacteria      | 102 |
| <i>Streptomyces vietnamensis</i>                                   | Actinobacteria      | 104 |
| <i>Streptomyces violaceusniger</i> Tu 4113                         | Actinobacteria      | 97  |
| <i>Streptosporangium roseum</i> DSM 43021                          | Actinobacteria      | 49  |
| <i>Tsukamurella paurometabola</i> DSM 20162                        | Actinobacteria      | 44  |
| <i>Verrucosispora maris</i> AB-18-032                              | Actinobacteria      | 89  |
| <i>Citrobacter freundii</i> CFNIH1                                 | Gammaproteobacteria | 89  |
| <i>Citrobacter koseri</i> ATCC BAA-895                             | Gammaproteobacteria | 87  |
| <i>Cronobacter sakazakii</i> ATCC BAA-894                          | Gammaproteobacteria | 87  |
| <i>Cronobacter turicensis</i> z3032                                | Gammaproteobacteria | 54  |
| <i>Enterobacter aerogenes</i> EA1509E                              | Gammaproteobacteria | 88  |
| <i>Enterobacter asburiae</i> L1                                    | Gammaproteobacteria | 87  |
| <i>Enterobacter cloacae</i> EcWSU1                                 | Gammaproteobacteria | 88  |
| <i>Enterobacter lignolyticus</i> SCF1                              | Gammaproteobacteria | 89  |
| <i>Enterobacter</i> sp. 638                                        | Gammaproteobacteria | 85  |
| <i>Klebsiella oxytoca</i> KONIH1                                   | Gammaproteobacteria | 88  |
| <i>Klebsiella pneumoniae</i> subsp. <i>pneumoniae</i>              | Gammaproteobacteria | 89  |
| <i>Klebsiella variicola</i> At-22                                  | Gammaproteobacteria | 89  |
| <i>Pluralibacter gergoviae</i>                                     | Gammaproteobacteria | 89  |
| <i>Raoultella ornithinolytica</i> B6                               | Gammaproteobacteria | 93  |
| <i>Shimwellia blattae</i> DSM 4481 = NBRC 105725                   | Gammaproteobacteria | 90  |
| <i>Phenylobacterium zucineum</i> HLK1                              | Alphaproteobacteria | 61  |
| <i>Sphingobium chlorophenolicum</i> L-1                            | Alphaproteobacteria | 90  |
| <i>Sphingobium japonicum</i> UT26S                                 | Alphaproteobacteria | 629 |

---
